# Supplementary material for: A predictive modelling approach to illustrate factors correlating with stunting among children aged 12–23 months: a cluster randomised pre-post study
Source: HighWire-hosted journal article supplement (doi:10.1136/bmjopen-2022-067961), 2023-04-01
Supplement: bmjopen-2022-067961supp001_data_supplement.pdf [file bmjopen-2022-067961supp001_data_supplement.pdf]

## Appendix 1. Sample size calculation

```
clustersampsi, binomial samplesize p1(0.47) p2(0.41) k40 rho0.01 alpha(0.05) beta(0.8)
```

### Output of the STATA command for sample size calculation

Sample size calculation to determine number of observations required per cluster, for a two-sample comparison of proportions (using normal approximations) without continuity correction.

For the user specified parameters:

```
p1: 0.4700
p2: 0.4100
significance level: 0.05
power: 0.80
number of clusters available: 40
intra cluster correlation (ICC): 0.0100
```

*clustersampsi* estimated parameters:

```
Firstly, assuming individual randomisation: sample size per arm: 1071
Then, allowing for cluster randomisation: average cluster size required: 38
sample size per arm: 1520
```

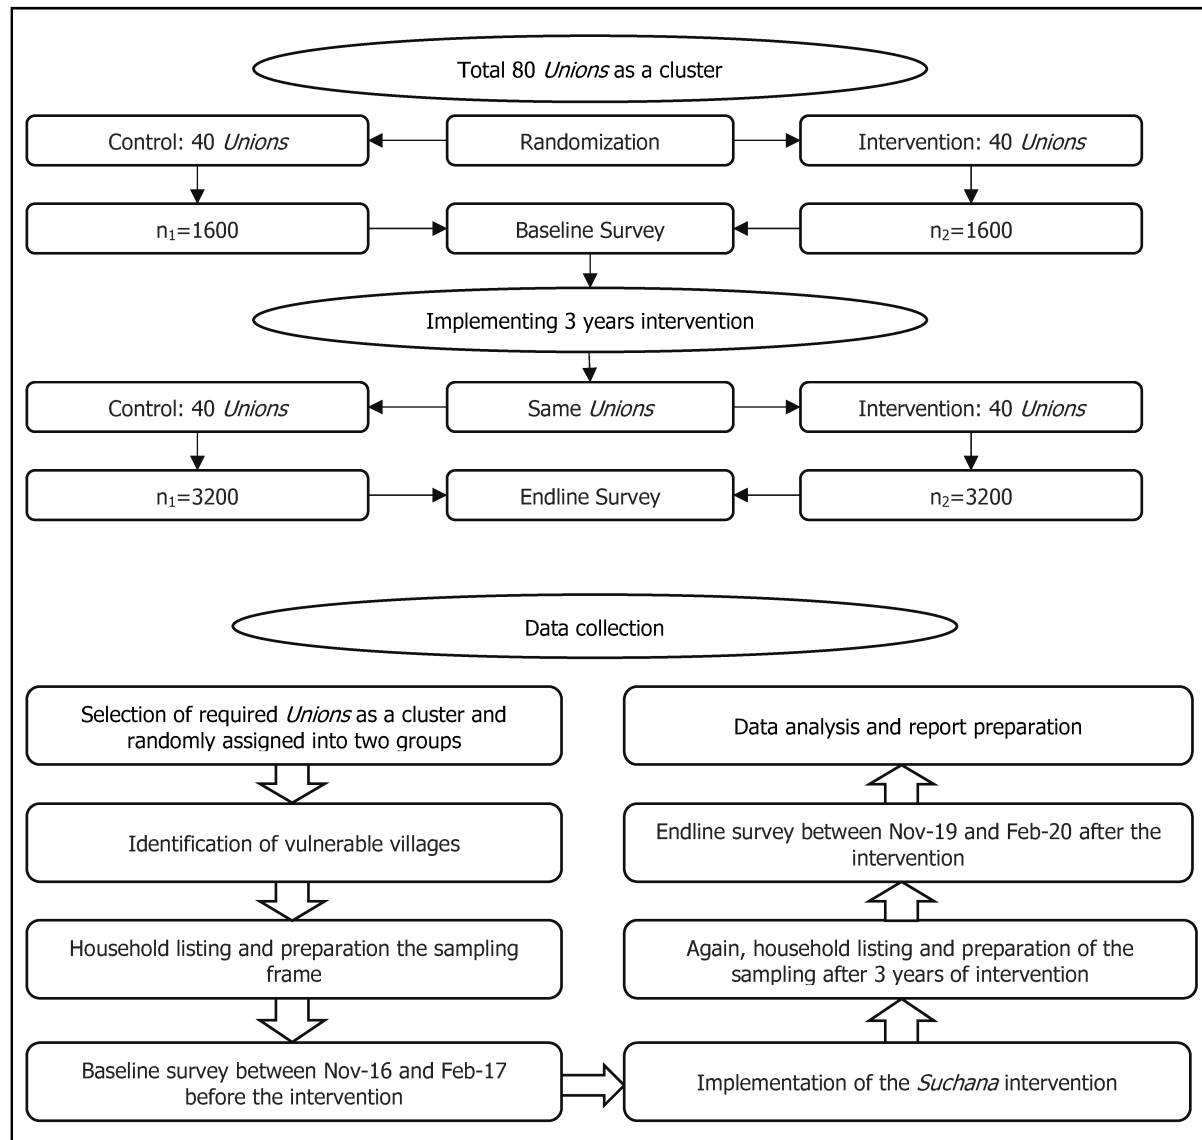

**Supplementary Figure 1.** The evaluation diagram of *Suchana* programme

## Appendix 2. Data collection

The Suchana data collection software contained built-in validation rules. As the data were entered at the interviewer level and the records were uploaded to a server at the icddr,b using the built-in internet connectivity of the devices, maximum validation rules were set in the data system to prevent errors during data entry, which reduced the data entry burden. This allowed the data analysis team to review the

consistency of the data every day. Data were synchronized to the central server “Web Service” developed in Asp.Net based on the C# (C Sharp) code. Activities such as editing (after receiving any feedback from field staff members), updating, range checks, duplication checks, consistency checks, frequency checks and cross tabulation were regularly performed during the data entry period. In case of any unusual observations, the issues were discussed and resolved.

### Appendix 3. Equation of logistic and probit regression

$$\text{logit}(y) = \beta_0 + \beta_1 X_1 + \beta_2 X_2 + \beta_3 X_3 + \beta_4 X_4 + \beta_5 X_5 + \beta_6 X_6 + \beta_7 X_7 + \beta_8 X_8 + \beta_9 X_9 + \beta_{10} X_{10} + \beta_{12} X_{12} + \beta_{13} X_{13} + \beta_{14} X_{14} + \beta_{15} X_{15} + \beta_{16} X_{16}$$

$$\text{probit}(y) = \beta_0 + \beta_1 X_1 + \beta_2 X_2 + \beta_3 X_3 + \beta_4 X_4 + \beta_5 X_5 + \beta_6 X_6 + \beta_7 X_7 + \beta_8 X_8 + \beta_9 X_9 + \beta_{10} X_{10} + \beta_{12} X_{12} + \beta_{13} X_{13} + \beta_{14} X_{14} + \beta_{15} X_{15} + \beta_{16} X_{16}$$

Where,

- |                                                             |                                                 |
|-------------------------------------------------------------|-------------------------------------------------|
| x1: Less than four ANC visits by a skilled service provider | x9: Having unhygienic latrine                   |
| x2: Unskilled birth attendant/facility                      | x10: Soap was unavailable in hand washing place |
| x3: Mother involved in income-generating activities         | x11: HH size $\geq 7$                           |
| x4: Maternal BMI <18.5                                      | x12: HH dietary diversity score <7              |
| x5: Maternal education: no schooling                        | x13: Child's age >18                            |
| x6: HH severe food insecurity                               | x14: Child's sex was male                       |
| x7: Monthly income <15000 BDT                               | x15: Childhood illness in the last 15 days      |
| x8: Did not involve with aquaculture                        | x16: Lacked access to mass media                |

and

$$\text{logit}(y) = \log[y/(1-y)]$$

**Supplementary Table 1. Suchana inclusion criteria for registration of enrolling as vulnerable households**

| Vulnerable household verification questions                                                                                                                                                                                                                                                                                                                                                                                                          | Inclusion criteria                                                                |
|------------------------------------------------------------------------------------------------------------------------------------------------------------------------------------------------------------------------------------------------------------------------------------------------------------------------------------------------------------------------------------------------------------------------------------------------------|-----------------------------------------------------------------------------------|
| <b>Step 1</b>                                                                                                                                                                                                                                                                                                                                                                                                                                        |                                                                                   |
| <ul style="list-style-type: none"> <li>Households currently participating/member of any livelihood, food security or asset transfer program</li> </ul>                                                                                                                                                                                                                                                                                               | If “NO” go ahead for next questions                                               |
| <b>Step 2</b>                                                                                                                                                                                                                                                                                                                                                                                                                                        |                                                                                   |
| <ul style="list-style-type: none"> <li>Ability to afford three (3) full meals per day for all family members round the year</li> <li>Households monthly income BDT 7,500 or more</li> <li>Household productive asset value worth BDT 15,000 or more (excluding land, pond and homestead)</li> <li>Ownership of homestead land 10 decimals or more</li> <li>Ownership of cultivable land 50 decimals or more (excluding homestead or pond)</li> </ul> | If anyone is “NO” go ahead for next questions                                     |
| <b>Step 3</b>                                                                                                                                                                                                                                                                                                                                                                                                                                        |                                                                                   |
| <ul style="list-style-type: none"> <li>Households have married women with in child bearing age (15 to 45 years)</li> <li>Households have pregnant women (including abandoned or widowed woman)</li> <li>Households have 0-23 months old children</li> <li>Households have adolescent girls (15-19 years)</li> </ul>                                                                                                                                  | If anyone is ‘Yes’ go ahead for registration of enrolling as vulnerable Household |
| Sampling frame was prepared for collecting data from mother-child pair if the households had 0-23 months old children                                                                                                                                                                                                                                                                                                                                |                                                                                   |

**Supplementary Table 2a. Predictive ability of various indicators for the adjusted prevalence of stunting and adjusted prevalence difference (effect size) in the fitted multiple logistic regression model.**

|                                                               | Prediction of adjusted stunting<br>[% (95% CI)] | Prediction of adjusted prevalence<br>difference as effect size* | p-value |
|---------------------------------------------------------------|-------------------------------------------------|-----------------------------------------------------------------|---------|
| <b>At least four ANC visits by a skilled service provider</b> |                                                 |                                                                 |         |
| Yes                                                           | 51.64 (50.05, 53.23)                            | Reference                                                       |         |
| No                                                            | 47.99 (45.46, 50.53)                            | 3.65 (1.07, 6.22)                                               | 0.006   |
| <b>Birth attendant/facility</b>                               |                                                 |                                                                 |         |
| Skilled                                                       | 51.87 (50.23, 53.51)                            | Reference                                                       |         |
| Unskilled                                                     | 49.42 (47.48, 51.36)                            | 2.45 (0.55, 4.35)                                               | 0.012   |
| <b>Mother involved in income-generating activities</b>        |                                                 |                                                                 |         |
| No                                                            | 54.55 (50.90, 58.19)                            | Reference                                                       |         |
| Yes                                                           | 50.59 (49.08, 52.11)                            | 3.95 (0.40, 7.51)                                               | 0.029   |
| <b>Maternal BMI</b>                                           |                                                 |                                                                 |         |
| BMI $\geq$ 18.5                                               | 54.04 (52.01, 56.07)                            | Reference                                                       |         |
| BMI <18.5                                                     | 49.01 (47.21, 50.81)                            | 5.03 (2.66, 7.41)                                               | <0.001  |
| <b>Maternal education was primary completed</b>               |                                                 |                                                                 |         |
| Yes                                                           | 54.66 (52.58, 56.74)                            | Reference                                                       |         |
| No                                                            | 48.21 (46.67, 49.75)                            | 6.45 (4.49, 8.40)                                               | <0.001  |
| <b>HH food insecurity</b>                                     |                                                 |                                                                 |         |
| Below severe                                                  | 53.03 (50.91, 55.15)                            | Reference                                                       |         |
| Severe                                                        | 50.36 (48.63, 52.09)                            | 2.66 (0.11, 5.22)                                               | 0.041   |
| <b>HH monthly income <math>\geq</math>15000 BDT</b>           |                                                 |                                                                 |         |
| Yes                                                           | 51.31 (49.79, 52.84)                            | Reference                                                       |         |
| No                                                            | 48.58 (45.86, 51.30)                            | 2.73 (0.17, 5.30)                                               | 0.037   |
| <b>Involved with aquaculture</b>                              |                                                 |                                                                 |         |
| Yes                                                           | 51.22 (49.72, 52.72)                            | Reference                                                       |         |
| No                                                            | 46.99 (43.30, 50.69)                            | 4.23 (0.73, 7.73)                                               | 0.018   |
| <b>Hygienic latrine</b>                                       |                                                 |                                                                 |         |
| Yes                                                           | 52.67 (50.94, 54.4)                             | Reference                                                       |         |
| No                                                            | 48.36 (46.5, 50.23)                             | 4.31 (2.34, 6.28)                                               | <0.001  |
| <b>Water and soap available in handwashing place</b>          |                                                 |                                                                 |         |
| Yes                                                           | 52.64 (50.71, 54.58)                            | Reference                                                       |         |
| No                                                            | 48.54 (46.74, 50.33)                            | 4.10 (1.83, 6.38)                                               | <0.001  |
| <b>HH size</b>                                                |                                                 |                                                                 |         |
| Below seven                                                   | 53.86 (51.98, 55.74)                            | Reference                                                       |         |
| Seven or above                                                | 49.41 (47.70, 51.13)                            | 4.44 (2.43, 6.46)                                               | <0.001  |
| <b>HH dietary diversity</b>                                   |                                                 |                                                                 |         |
| HDDS $\geq$ 7                                                 | 53.92 (51.25, 56.60)                            | Reference                                                       |         |
| HDDS <7                                                       | 50.10 (48.70, 51.50)                            | 3.83 (1.63, 6.02)                                               | <0.001  |
| <b>Child's age</b>                                            |                                                 |                                                                 |         |
| Age $\leq$ 18 months                                          | 56.72 (54.77, 58.67)                            | Reference                                                       |         |
| Age >18 months                                                | 46.59 (44.82, 48.35)                            | 10.1 (7.94, 12.32)                                              | <0.001  |
| <b>Child's sex</b>                                            |                                                 |                                                                 |         |
| Female                                                        | 53.25 (51.17, 55.34)                            | Reference                                                       |         |
| Male                                                          | 48.40 (46.78, 50.03)                            | 4.85 (2.59, 7.10)                                               | <0.001  |
| <b>Childhood illness in the last 15 days</b>                  |                                                 |                                                                 |         |
| No                                                            | 54.90 (52.04, 57.77)                            | Reference                                                       |         |
| Yes                                                           | 50.49 (48.94, 52.05)                            | 4.41 (1.48, 7.34)                                               | 0.003   |
| <b>Access of mass media</b>                                   |                                                 |                                                                 |         |
| Yes                                                           | 51.51 (49.88, 53.15)                            | Reference                                                       |         |
| No                                                            | 48.13 (45.39, 50.88)                            | 3.38 (0.42, 6.34)                                               | 0.028   |

\*Differences in the predicted values of stunting between the two groups were calculated using the Stata "adjrr" package

**Supplementary Table 2b. Predictive ability of various indicators for the adjusted prevalence of stunting and adjusted prevalence difference (effect size) in the fitted multiple probit regression model.**

|                                                               | Prediction of adjusted stunting<br>[% (95% CI)] | Prediction of adjusted prevalence<br>difference as effect size* | p-value |
|---------------------------------------------------------------|-------------------------------------------------|-----------------------------------------------------------------|---------|
| <b>At least four ANC visits by a skilled service provider</b> |                                                 |                                                                 |         |
| Yes                                                           | 51.64 (50.05, 53.23)                            | Reference                                                       |         |
| No                                                            | 47.99 (45.46, 50.53)                            | 3.65 (1.08, 6.22)                                               | 0.007   |
| <b>Birth attendant/facility</b>                               |                                                 |                                                                 |         |
| Skilled                                                       | 51.87 (50.23, 53.51)                            | Reference                                                       |         |
| Unskilled                                                     | 49.42 (47.48, 51.36)                            | 2.45 (0.54, 4.35)                                               | 0.011   |
| <b>Mother involved in income-generating activities</b>        |                                                 |                                                                 |         |
| No                                                            | 54.55 (50.90, 58.16)                            | Reference                                                       |         |
| Yes                                                           | 50.59 (49.08, 52.11)                            | 3.93 (0.39, 7.48)                                               | 0.024   |
| <b>Maternal BMI</b>                                           |                                                 |                                                                 |         |
| BMI $\geq$ 18.5                                               | 54.04 (52.01, 56.07)                            | Reference                                                       |         |
| BMI <18.5                                                     | 49.01 (47.21, 50.81)                            | 5.03 (2.66, 7.40)                                               | <0.001  |
| <b>Maternal education was primary completed</b>               |                                                 |                                                                 |         |
| Yes                                                           | 54.66 (52.58, 56.74)                            | Reference                                                       |         |
| No                                                            | 48.21 (46.67, 49.75)                            | 6.45 (4.49, 8.41)                                               | <0.001  |
| <b>HH food insecurity</b>                                     |                                                 |                                                                 |         |
| Below severe                                                  | 53.01 (50.89, 55.12)                            | Reference                                                       |         |
| Severe                                                        | 50.37 (48.64, 52.10)                            | 2.64 (0.09, 5.19)                                               | 0.042   |
| <b>HH monthly income <math>\geq</math>15000 BDT</b>           |                                                 |                                                                 |         |
| Yes                                                           | 51.32 (49.79, 52.84)                            | Reference                                                       |         |
| No                                                            | 48.56 (45.84, 51.28)                            | 2.75 (0.19, 5.32)                                               | 0.035   |
| <b>Involved with aquaculture</b>                              |                                                 |                                                                 |         |
| Yes                                                           | 51.22 (49.73, 52.71)                            | Reference                                                       |         |
| No                                                            | 46.99 (43.28, 50.69)                            | 4.24 (0.73, 7.74)                                               | 0.018   |
| <b>Hygienic latrine</b>                                       |                                                 |                                                                 |         |
| Yes                                                           | 52.67 (50.94, 54.4)                             | Reference                                                       |         |
| No                                                            | 48.36 (46.5, 50.23)                             | 4.31 (2.34, 6.28)                                               | <0.001  |
| <b>Water and soap available in handwashing place</b>          |                                                 |                                                                 |         |
| Yes                                                           | 52.64 (50.71, 54.58)                            | Reference                                                       |         |
| No                                                            | 48.53 (46.74, 50.33)                            | 4.11 (1.83, 6.39)                                               | <0.001  |
| <b>HH size</b>                                                |                                                 |                                                                 |         |
| Below seven                                                   | 53.86 (51.98, 55.73)                            | Reference                                                       |         |
| Seven or above                                                | 49.41 (47.70, 51.13)                            | 4.44 (2.43, 6.46)                                               | <0.001  |
| <b>HH dietary diversity</b>                                   |                                                 |                                                                 |         |
| HDDS $\geq$ 7                                                 | 53.90 (51.23, 56.57)                            | Reference                                                       |         |
| HDDS <7                                                       | 50.10 (48.71, 51.50)                            | 3.79 (1.60, 5.98)                                               | <0.001  |
| <b>Child's age</b>                                            |                                                 |                                                                 |         |
| Age $\leq$ 18 months                                          | 56.72 (54.76, 58.67)                            | Reference                                                       |         |
| Age >18 months                                                | 46.59 (44.83, 48.35)                            | 10.1 (7.93, 12.3)                                               | <0.001  |
| <b>Child's sex</b>                                            |                                                 |                                                                 |         |
| Female                                                        | 53.25 (51.17, 55.33)                            | Reference                                                       |         |
| Male                                                          | 48.41 (46.78, 50.03)                            | 4.85 (2.60, 7.10)                                               | <0.001  |
| <b>Childhood illness in the last 15 days</b>                  |                                                 |                                                                 |         |
| No                                                            | 54.90 (52.04, 57.75)                            | Reference                                                       |         |
| Yes                                                           | 50.50 (48.94, 52.05)                            | 4.40 (1.47, 7.33)                                               | 0.003   |
| <b>Access of mass media</b>                                   |                                                 |                                                                 |         |
| Yes                                                           | 51.51 (49.88, 53.15)                            | Reference                                                       |         |
| No                                                            | 48.13 (45.40, 50.86)                            | 3.38 (0.42, 6.34)                                               | 0.028   |

\*Differences in the predicted values of stunting between the two groups were calculated using the Stata "adjrr" package
